# Supplementary material
Source: publisher site journal article supplement (https://www.spandidos-publications.com/5993/downloadSupplementary)
Supplement: Supplementary file 1 [file downloadSupplementary]

Table SI. Patients stratified by European Society for Therapeutic Radiology and Oncology/European Organization for Research and Treatment of Cancer classification.

| Category                                | of % (n) | Median overall survival<br>Months | P-value | Median progression-free survival<br>Months | P-value |
|-----------------------------------------|----------|-----------------------------------|---------|--------------------------------------------|---------|
| oligometastatic disease                 |          |                                   |         |                                            |         |
| Synchronous oligometastasis (reference) | 40 (52)  | 42.8                              | -       | 12.5                                       | -       |
| Metachronous oligorecurrence            | 29 (38)  | 27.3                              | 0.89    | 20.1                                       | 0.49    |
| Metachronous oligoprogression           | 8 (10)   | 45.2                              | 0.71    | 24.3                                       | 0.23    |
| Repeat oligorecurrence                  | 6 (8)    | Not reached                       | 0.19    | 23.9                                       | 0.17    |
| Repeat oligopersistence                 | 1 (1)    | TFP                               | N/A     | TFP                                        | N/A     |
| Repeat oligoprogression                 | 4 (5)    | 8.3                               | <0.01   | 3.9                                        | <0.01   |
| Induced oligorecurrence                 | 2 (2)    | TFP                               | N/A     | TFP                                        | N/A     |
| Induced oligopersistence                | 3 (4)    | 17.0                              | 0.24    | 3.8                                        | 0.40    |
| Induced oligoprogression                | 8 (10)   | 31.7                              | 0.20    | 7.0                                        | 0.16    |

TFP, too few patients.

Table SII. Patients stratified by type of systemic therapy received.

| Adjuvant systemic therapy                                                      | % (n)   |
|--------------------------------------------------------------------------------|---------|
| None                                                                           | 26 (34) |
| Chemotherapy alone                                                             | 18 (23) |
| Hormonal therapy alone or with androgen receptor inhibitor or CDK4/6 inhibitor | 15 (19) |
| Immunotherapy alone                                                            | 12 (15) |
| Chemotherapy combined with biologically targeted therapy                       | 10 (13) |
| Biologically targeted therapy alone                                            | 9 (12)  |
| Chemoimmunotherapy                                                             | 9 (12)  |
| Hormonal therapy with chemotherapy or targeted therapy                         | 2 (2)   |

Table SIII. Univariate analyses of potential prognostic factors.

| Variable                                                      | Median overall survival |         | Median progression-free survival |         |
|---------------------------------------------------------------|-------------------------|---------|----------------------------------|---------|
|                                                               | Months                  | P-value | Months                           | P-value |
| Age (years)                                                   |                         | <0.01   |                                  | <0.01   |
| <60                                                           | Not reached             |         | 23.9                             |         |
| 60-79                                                         | 39.8                    |         | 10.4                             |         |
| ≥80                                                           | 19.7                    |         | 9.3                              |         |
| Sex (F vs. M)                                                 |                         | 0.19    |                                  | 0.21    |
| Male                                                          | 45.3                    |         | 12.9                             |         |
| Female                                                        | 28.9                    |         | 10.4                             |         |
| ECOG performance status<br>(0 vs. 1 vs. 2 vs. 3-4)            |                         | <0.01   |                                  | 0.07    |
| 0                                                             | Not reached             |         | 22.3                             |         |
| 1                                                             | 28.9                    |         | 10.4                             |         |
| 2                                                             | 18.6                    |         | 8.8                              |         |
| 3-4                                                           | 12.8                    |         | 10.1                             |         |
| Category of<br>oligometastatic disease<br>(induced vs. other) |                         | 0.07    |                                  | 0.05    |
| <i>De novo</i> oligometastases<br>(reference)                 | 43.9                    |         | 14.4                             |         |
| Recurrent oligometastases                                     | 17.9                    | 0.84    | 9.3                              | 0.75    |
| Induced oligometastases                                       | 31.7                    | 0.07    | 8.8                              | 0.04    |
| Primary tumor (breast,<br>prostate or kidney vs.<br>other)    |                         | <0.01   |                                  | <0.01   |
| Lung                                                          | 43.9                    | 0.02    | 10.1                             | <0.01   |
| Prostate (reference)                                          | Not reached             |         | 46.2                             |         |
| Breast                                                        | 82.9                    | 0.19    | 14.4                             | 0.11    |
| Colorectal                                                    | 39.8                    | 0.02    | 10.4                             | <0.01   |
| Endometrial                                                   | 31.7                    | <0.01   | 7.0                              | 0.03    |
| Other                                                         | 24.3                    | <0.01   | 8.3                              | <0.01   |
| Metastasis location                                           |                         |         |                                  |         |
| Bone                                                          | 37.9                    | 0.33    | 21.0                             | 0.30    |
| Brain                                                         | 29.8                    | 0.42    | 7.1                              | 0.34    |
| Lung                                                          | 39.8                    | 0.51    | 15.9                             | 0.95    |
| Distant lymph nodes                                           | 45.2                    | 0.75    | 15.8                             | 0.63    |
| Liver                                                         | 9.9                     | 0.11    | 8.7                              | 0.12    |
| Adrenal gland                                                 | 12.2                    | 0.61    | 9.3                              | 0.40    |
| Albumin<br>(g/dl;continuous)                                  |                         | 0.03    |                                  | <0.01   |
| ≥3.4                                                          | 45.2                    |         | 13.8                             |         |
| 2.4-3.3                                                       | 18.5                    |         | 9.6                              |         |
| <2.4                                                          | 7.1                     |         | 3.0                              |         |
| Unknown                                                       | 31.7                    |         | 26.9                             |         |
| No. of metastases treated                                     |                         |         |                                  |         |
| 0                                                             | 31.7                    | 0.46    | 12.9                             | 0.93    |
| 1 (reference)                                                 | 45.2                    |         | 12.5                             |         |
| 2 to 5                                                        | 32.3                    | 0.20    | 10.9                             | 0.05    |
| Active primary tumor<br>requiring treatment                   |                         | 0.35    |                                  | 0.67    |
| No (reference)                                                | 33.0                    |         | 8.3                              |         |
| Yes                                                           | 53.8                    |         | 12.9                             |         |
| Post-radiation systemic<br>therapy                            |                         | 0.22    |                                  | 0.97    |
| No (reference)                                                | 43.9                    |         | 8.3                              |         |
| Yes                                                           | 37.9                    |         | 12.9                             |         |
